# Supplementary material
Source: publisher figshare collection journal article supplement (https://karger.figshare.com/ndownloader/files/28850277)

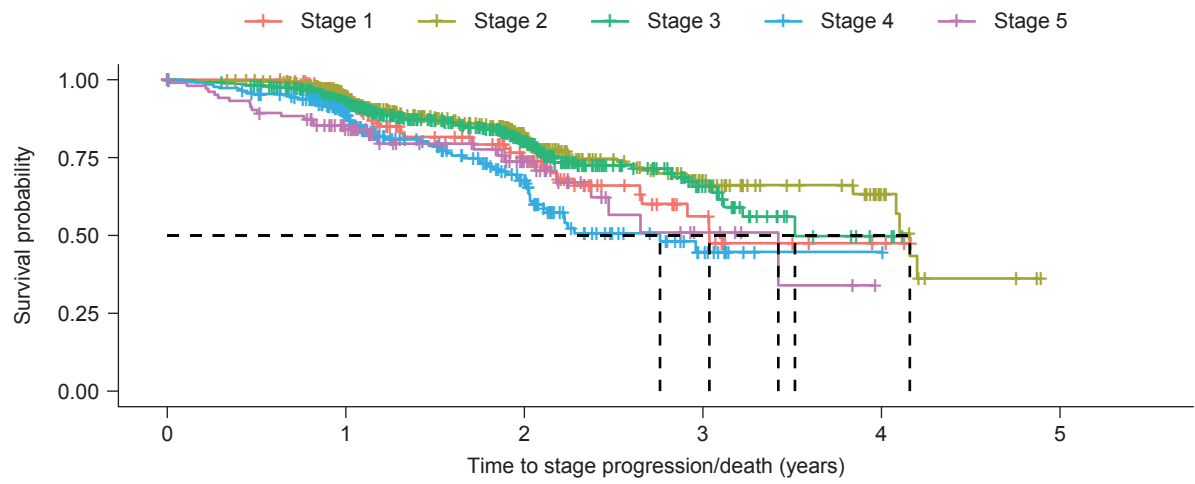

Number at risk

|         | 0   | 1   | 2   | 3  | 4  | 5 |
|---------|-----|-----|-----|----|----|---|
| Stage 1 | 266 | 120 | 52  | 14 | 3  | 0 |
| Stage 2 | 892 | 415 | 170 | 44 | 12 | 0 |
| Stage 3 | 943 | 412 | 161 | 36 | 3  | 0 |
| Stage 4 | 451 | 174 | 64  | 11 | 1  | 0 |
| Stage 5 | 170 | 66  | 29  | 6  | 0  | 0 |

Time to stage progression/death (years)

Supplement: Supplementary file 1 [file 28850277]
